# Supplementary material for: Explaining the Female Preponderance in Adolescent Depression—A Four-Wave Cohort Study
Source: Springer Nature journal article supplement (doi:10.1007/s10802-023-01031-6), 2023-02-04
Supplement: MOESM1 [file 23994198]

# Figure S1

## Flow chart of recruitment and follow-up

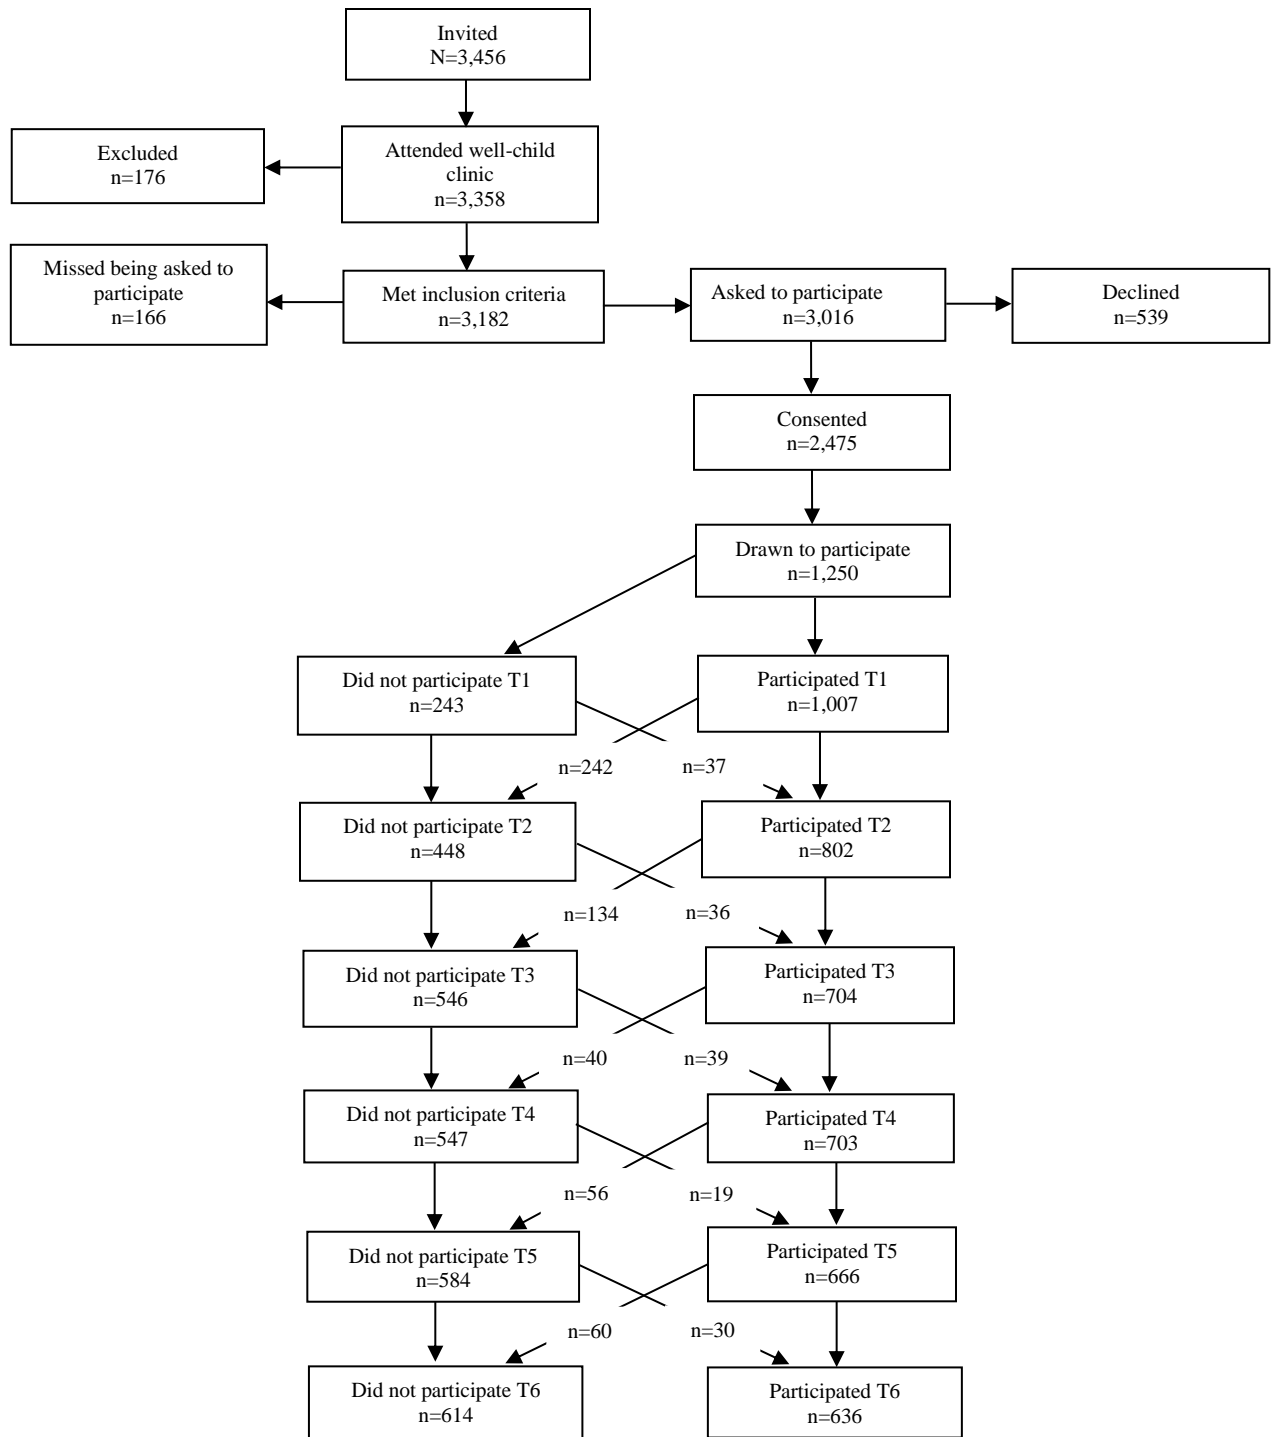

*Note.* Number of participants at the various assessment points is based on the number of participants invited to participate ( $n = 1,250$ ) minus those who did not participate at the respective measurement point (i.e., T1, T2).

## **Appendix S1**

### *List of stressful life events*

1. *Have one or more children that are not your siblings come to live in your home?*
2. *Have you gotten new half- or full siblings?*
3. *Have your parents separated or divorced and no longer live together?*
4. *Did a new adult move into your home, e.g., a new girl/boy-friend or partner to your parents?*
5. *Did such a new adult move out of your home, e.g., a new girl/boy-friend or partner?*
6. *Have you moved to a new place?*
7. *Have you changed your school?*
8. *Have your parents been evaluated at or admitted to a hospital for more than 24 hours?*
9. *Have either of your parents suffered a life-threatening illness which made them unable to work?*
10. *Have either of your parents been admitted to a hospital for more than 7 days?*
11. *Have you lost contact with someone important to you (such as a friend or relative)?*
12. *Have you and a best friend parted because you had a quarrel or fight (seems to be permanent)?*
13. *Have you and a girl/boy-friend broken up because you fought, were no longer in love, or because one of you moved?*
14. *Did a pet you felt close to die?*
15. *Have either of your parents been in prison?*
16. *Has your family's income been substantially less than usual?*
17. *Have you been forced to live elsewhere than your home for a period?*
18. *Have you ever gotten very sick (risk of death or a serious illness)?*
19. *Have you ever been admitted to a hospital for more than 24 hours?*
20. *Have you ever been in a serious accident? (fire/burn, poisoning, traffic-accident, near drowning, bitten by an animal, ect.?)*
21. *Has anyone close to you died (parents or full- half- and step- siblings)?*
22. *Have you ever experienced a serious natural disaster, such as a storm, hurricane, flood, earthquake?*
23. *Have you ever been in a terrible fire?*
24. *Have you ever seen or heard something horrible happen to anyone?*
25. *Have you ever heard about something horrible happen to someone you care about, but not seen it yourself?*
26. *Have you ever had contact with something that could make you very sick or die?*
27. *Have you or someone you were with ever hurt another person seriously?*
28. *Have you ever been hit or hurt by somebody?*
29. *Have anyone in your family ever hit or hurt you badly?*
30. *Have you ever been kidnapped or locked up against your will?*
31. *Have you ever been exposed to sexual abuse?*

*Note.* Parents and children were asked to affirm if the following events occurred during the last two years.

**Table S1***Associations between depression, stressful life events, and bullying victimization, ages 8-14*

|                                     | 1     | 2      | 3      | 4      | 5      | 6      | 7      | 8      | 9    | 10     | 11     | 12     | 13 |
|-------------------------------------|-------|--------|--------|--------|--------|--------|--------|--------|------|--------|--------|--------|----|
| 1. Gender                           | 1     |        |        |        |        |        |        |        |      |        |        |        |    |
| 2. Depression – age 8               | -.11* | 1      |        |        |        |        |        |        |      |        |        |        |    |
| 3. Depression – age 10              | .02   | .31*** | 1      |        |        |        |        |        |      |        |        |        |    |
| 4. Depression – age 12              | .09*  | .37*** | .38*** | 1      |        |        |        |        |      |        |        |        |    |
| 5. Depression – age 14              | .14** | .26*** | .36*** | .55*** | 1      |        |        |        |      |        |        |        |    |
| 6. Stressful life events – age 8    | -.05  | .05    | -.01   | .08    | .10    | 1      |        |        |      |        |        |        |    |
| 7. Stressful life events – age 10   | .02   | -.00   | .08    | .01    | .12**  | .38*** | 1      |        |      |        |        |        |    |
| 8. Stressful life events – age 12   | -.06  | .02    | .18**  | .12**  | .23*** | .29*** | .39*** | 1      |      |        |        |        |    |
| 9. Stressful life events – age 14   | .07   | .06    | .11*   | .13*   | .22*** | .18**  | .18**  | .45*** | 1    |        |        |        |    |
| 10. Bullying victimization – age 8  | -.00  | .21*** | .04    | .14*   | .18**  | .11    | .08    | .11*   | .12  | 1      |        |        |    |
| 11. Bullying victimization – age 10 | -.05* | .19*** | .09    | .12*   | .15**  | -.02   | -.03   | .03    | .09  | .39*** | 1      |        |    |
| 12. Bullying victimization – age 12 | -.11* | .09    | .08    | .21*** | .25*** | .02    | .03    | -.02   | .12* | .22*** | .33*** | 1      |    |
| 13. Bullying victimization – age 14 | .03   | .11    | .07    | .12*   | .20**  | .02    | .02    | .01    | .12* | .21*** | .23**  | .39*** | 1  |

$r$  = Pearson product-moment coefficient. \* indicates  $p < .05$ , \*\* indicates  $p < .01$ , \*\*\* indicates  $p < .001$ .
